# Supplementary material
Source: MDPI journal article supplement (https://www.mdpi.com/2073-4441/13/24/3571)
Supplement: s1 [file s1]

### Supplementary Table

**Supplementary Table S1.** Water quality parameters with WHO and Bangladesh standards

| Sample ID        | Parameters |                    |                   |                              |                              |                           |                           |                   |                   |
|------------------|------------|--------------------|-------------------|------------------------------|------------------------------|---------------------------|---------------------------|-------------------|-------------------|
|                  | pH         | Turbidity<br>(NTU) | Salinity<br>(ppt) | NH <sub>4</sub> -N<br>(mg/L) | NO <sub>3</sub> -N<br>(mg/L) | PO <sub>4</sub><br>(mg/L) | SO <sub>4</sub><br>(mg/L) | FC<br>(cfu/100ml) | TC<br>(cfu/100ml) |
| PSF-1            | 8.3        | 7                  | 2.5               | 0.37                         | 0.8                          | 0.67                      | 10.7                      | 18                | 210               |
| PSF-2            | 6.9        | 3                  | 1.9               | 0.29                         | 1.1                          | 0.16                      | 16.6                      | 39                | 470               |
| PSF-3            | 6.7        | 11                 | 1.3               | 0.46                         | 0.9                          | 0.24                      | 30                        | 230               | 1140              |
| PSF-4            | 7.4        | 8                  | 3.2               | 0.39                         | 1                            | 0.7                       | 47.6                      | 46                | 560               |
| PSF-5            | 7.1        | 4                  | 1.76              | 0.44                         | 1.2                          | 0.56                      | 34                        | 0                 | 30                |
| PSF-6            | 7.6        | 9                  | 1.23              | 0.36                         | 1.2                          | 0.25                      | 22                        | 29                | 200               |
| PSF-7            | 7.2        | 5                  | 2.58              | 0.42                         | 0.7                          | 0.56                      | 36.6                      | 62                | 340               |
| PSF-8            | 8.2        | 6                  | 2                 | 0.28                         | 1.6                          | 0.38                      | 24.3                      | 5                 | 10                |
| PSF-9            | 8.7        | 13                 | 1.48              | 0.44                         | 1.1                          | 0.27                      | 12                        | 380               | 2900              |
| PSF-10           | 7.3        | 4                  | 2.2               | 0.31                         | 0.9                          | 0.15                      | 42                        | 120               | 580               |
| PSF-11           | 6.6        | 15                 | 3.1               | 0.35                         | 1.7                          | 0.8                       | 65.6                      | 600               | 2000              |
| PSF-12           | 7.1        | 7                  | 1.7               | 0.48                         | 0.6                          | 0.55                      | 27.8                      | 220               | 320               |
| PSF-13           | 6.9        | 3                  | 2.19              | 0.54                         | 1.3                          | 0.81                      | 44.2                      | 6                 | 80                |
| RWH-1            | 8.1        | 2                  | 0.3               | 0.37                         | 3.9                          | 0.11                      | 8.5                       | 15                | 280               |
| RWH-2            | 8.3        | 1                  | 0.1               | 0.11                         | 4.4                          | 0.02                      | 17.4                      | 0                 | 20                |
| RWH-3            | 7.4        | 2                  | 0                 | 0.03                         | 2.5                          | 0.06                      | 2.3                       | 5                 | 70                |
| RWH-4            | 7.7        | 8                  | 0.1               | 0.09                         | 3.3                          | 0.08                      | 14.7                      | 90                | 750               |
| RWH-5            | 8.2        | 3                  | 0.2               | 0.24                         | 5.1                          | 0.16                      | 25                        | 150               | 3600              |
| Pond-1           | 6.9        | 83                 | 2.1               | 0.44                         | 1.2                          | 0.95                      | 16.3                      | 1200              | 3000              |
| Pond-2           | 7.1        | 100                | 1.6               | 0.25                         | 1.2                          | 0.57                      | 50                        | 300               | 4800              |
| Pond-3           | 7.6        | 91                 | 2.4               | 0.48                         | 1.4                          | 0.73                      | 23.6                      | 800               | 13000             |
| Pond-4           | 7.7        | 76                 | 1.85              | 0.31                         | 1.1                          | 0.61                      | 38.7                      | 1100              | 2400              |
| Pond-5           | 7.2        | 94                 | 3.5               | 0.63                         | 0.9                          | 0.37                      | 62.2                      | 3000              | 7000              |
| Pond-6           | 7.7        | 88                 | 2.2               | 0.43                         | 1.5                          | 0.47                      | 42.7                      | 120               | 2700              |
| Pond-7           | 8.2        | 103                | 1.35              | 0.37                         | 1.4                          | 0.65                      | 36.6                      | 2100              | 4000              |
| Pond-8           | 7.2        | 126                | 2.6               | 0.75                         | 0.8                          | 0.5                       | 77                        | 5000              | 15000             |
| Pond-9           | 8.4        | 111                | 2.16              | 0.4                          | 2.1                          | 0.95                      | 19.4                      | 1700              | 17000             |
| Pond-10          | 6.8        | 98                 | 3                 | 0.52                         | 1                            | 0.33                      | 28.1                      | 700               | 4000              |
| WHO <sup>a</sup> | ☆          | 5                  | ☆                 | ☆                            | 11                           | ☆                         | ☆                         | 0                 | 0                 |
| BDS <sup>b</sup> | 6.5-8.5    | 10                 | 1                 | ☆                            | 10                           | 6                         | 400                       | 0                 | 0                 |

<sup>a</sup>Drinking water quality guideline (WHO 2011), <sup>b</sup>Drinking water quality standards of Bangladesh (ECR 1997)

‘☆’ guideline values have not been established
